# Supplementary material for: HyperCAT: an extension of the SuperCAT database for global multi-scheme and multi-datatype phylogenetic analysis of the Bacillus cereus group population
Source: Oxford University Press journal article supplement (doi:10.1093/database/baq017), 2010-01-01
Supplement: baq017_Supplementary_Data.zip [file baq017_Supplementary_Data.zip]

Archive with 6 entries (6 files):
- MLST_AFLP_Supertree2143_all_newnames_rooted_AFLP_Hill_redrawn.eps
- Supertree2315_newnames_rooted_replicates18-34_redrawn.eps
- Supertree2315_newnames_rooted_replicates1-17_redrawn.eps
- MLST_AFLP_MLEE_paperV14_Database_supplegends.pdf
- MLST_AFLP_Supertree2143_all_newnames_rooted_MLST_Priest_redrawn.eps
- MLST_AFLP_Supertree2143_all_newnames_rooted_AFLP_Guinebretiere_redrawn.eps
